# Supplementary material for: Detecting heterogeneity in single-cell RNA-Seq data by non-negative matrix factorization
Source: PubMed Central journal article supplement (PMC5251935; doi:10.7717/peerj.2888), 2017-01-19

**A**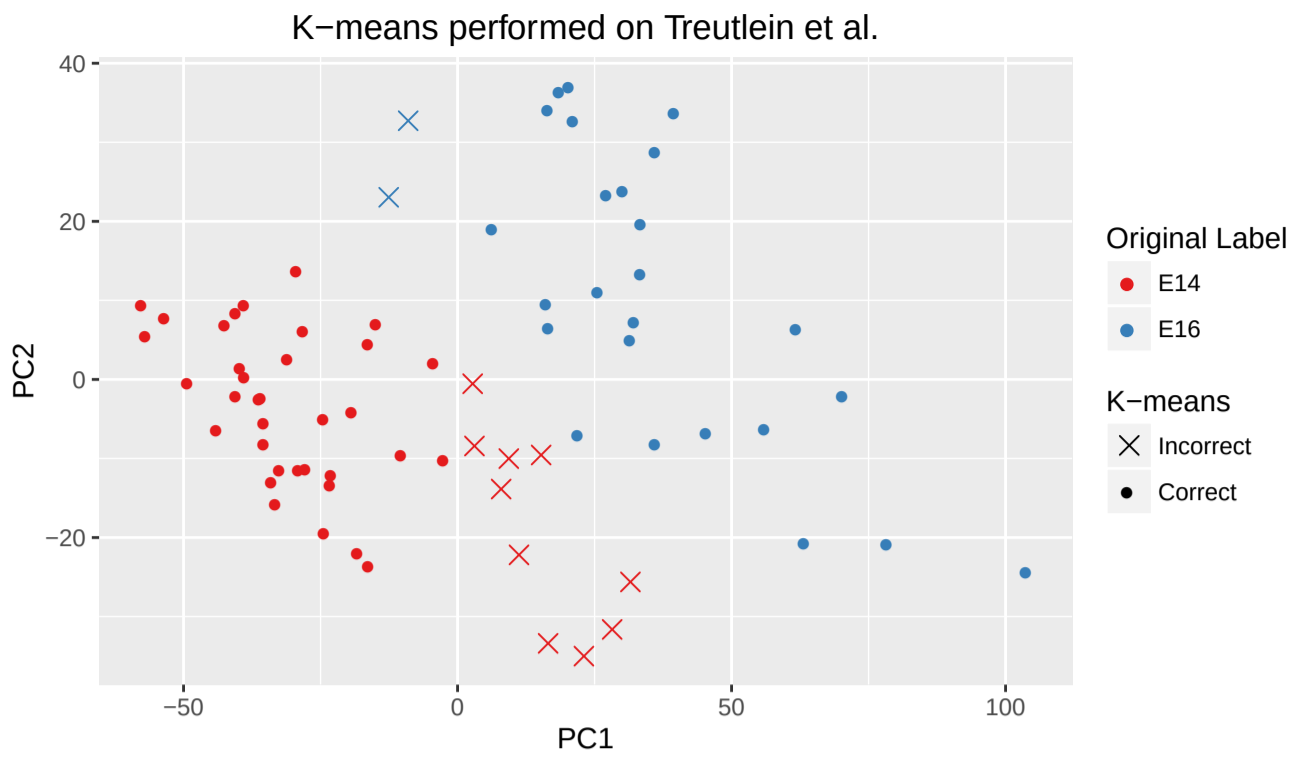**B**

Dendrogram of Hierarchical Clustering (Euclidean + Complete) on Treutlein et al.

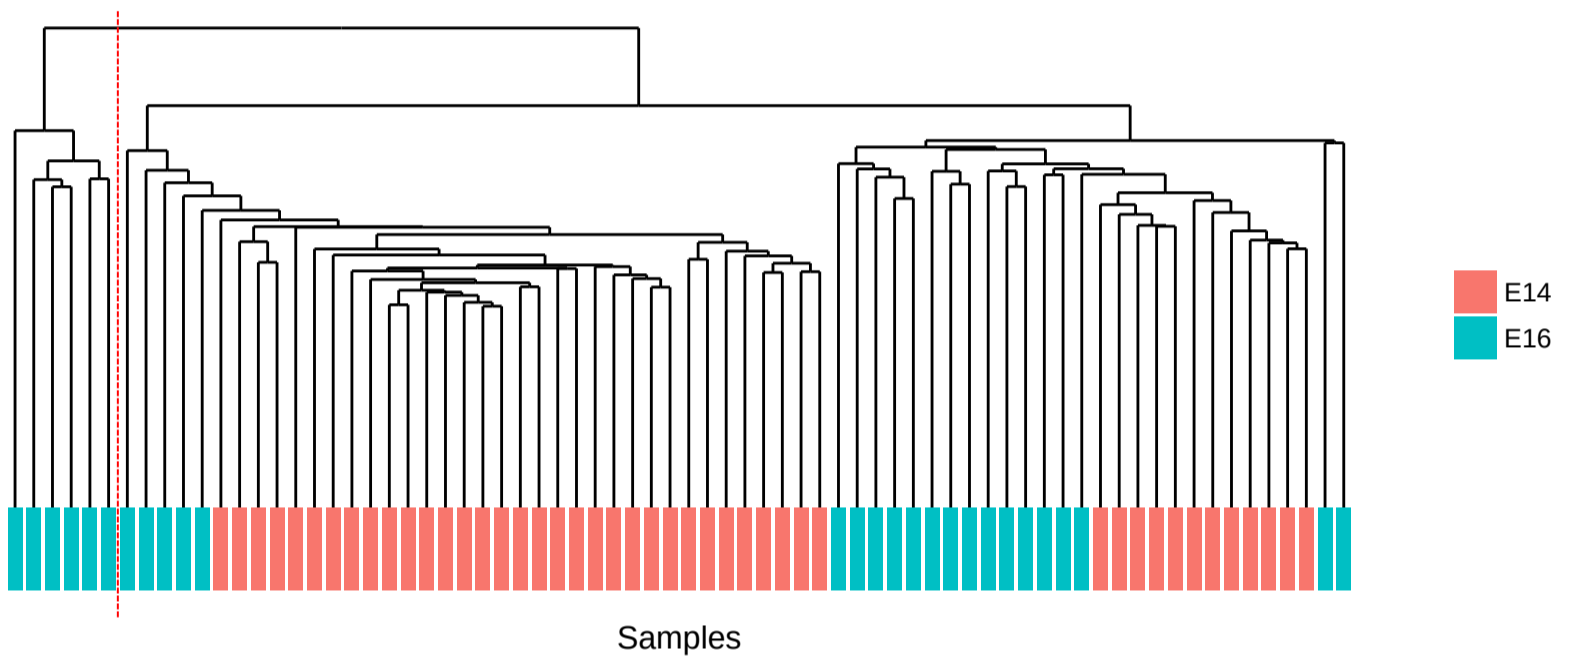**C**

Dendrogram of Hierarchical Clustering (Euclidean + Ward) on Treutlein et al.

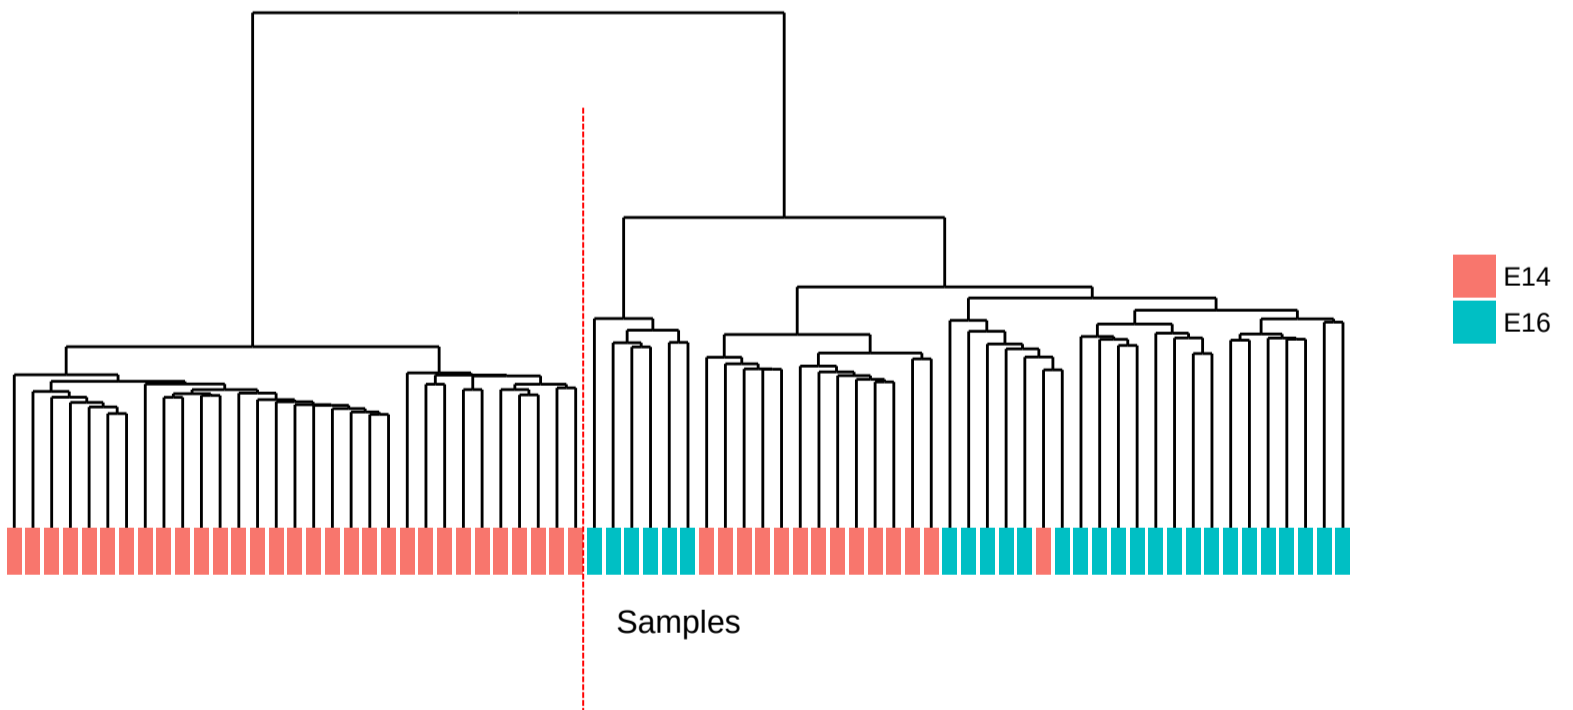**D**

Dendrogram of Hierarchical Clustering (Correlation + Complete) on Treutlein et al.

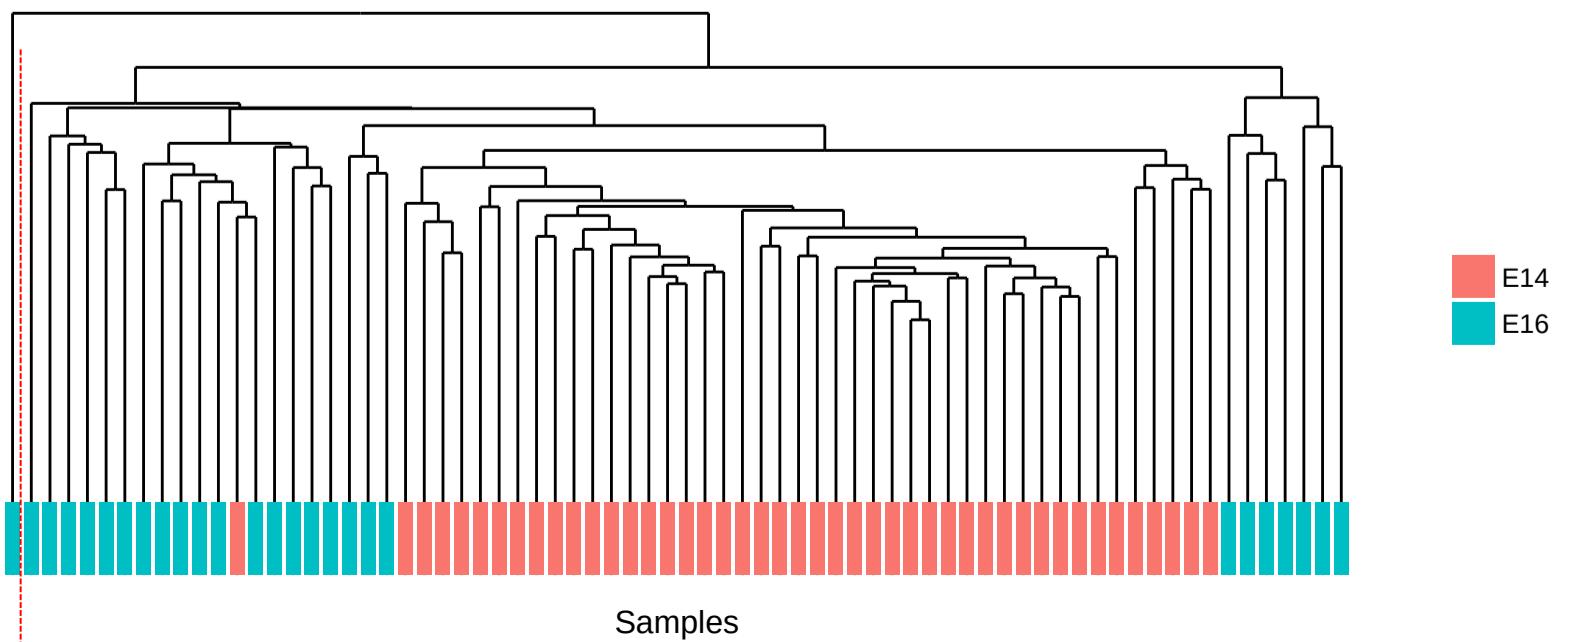

Supplement: peerj-05-2888-s001.pdf [file peerj-05-2888-s001.pdf]
