# Supplementary material for: Detecting heterogeneity in single-cell RNA-Seq data by non-negative matrix factorization
Source: PubMed Central journal article supplement (PMC5251935; doi:10.7717/peerj.2888), 2017-01-19

Comparison of expression level distribution  
between the genes selected by different methods

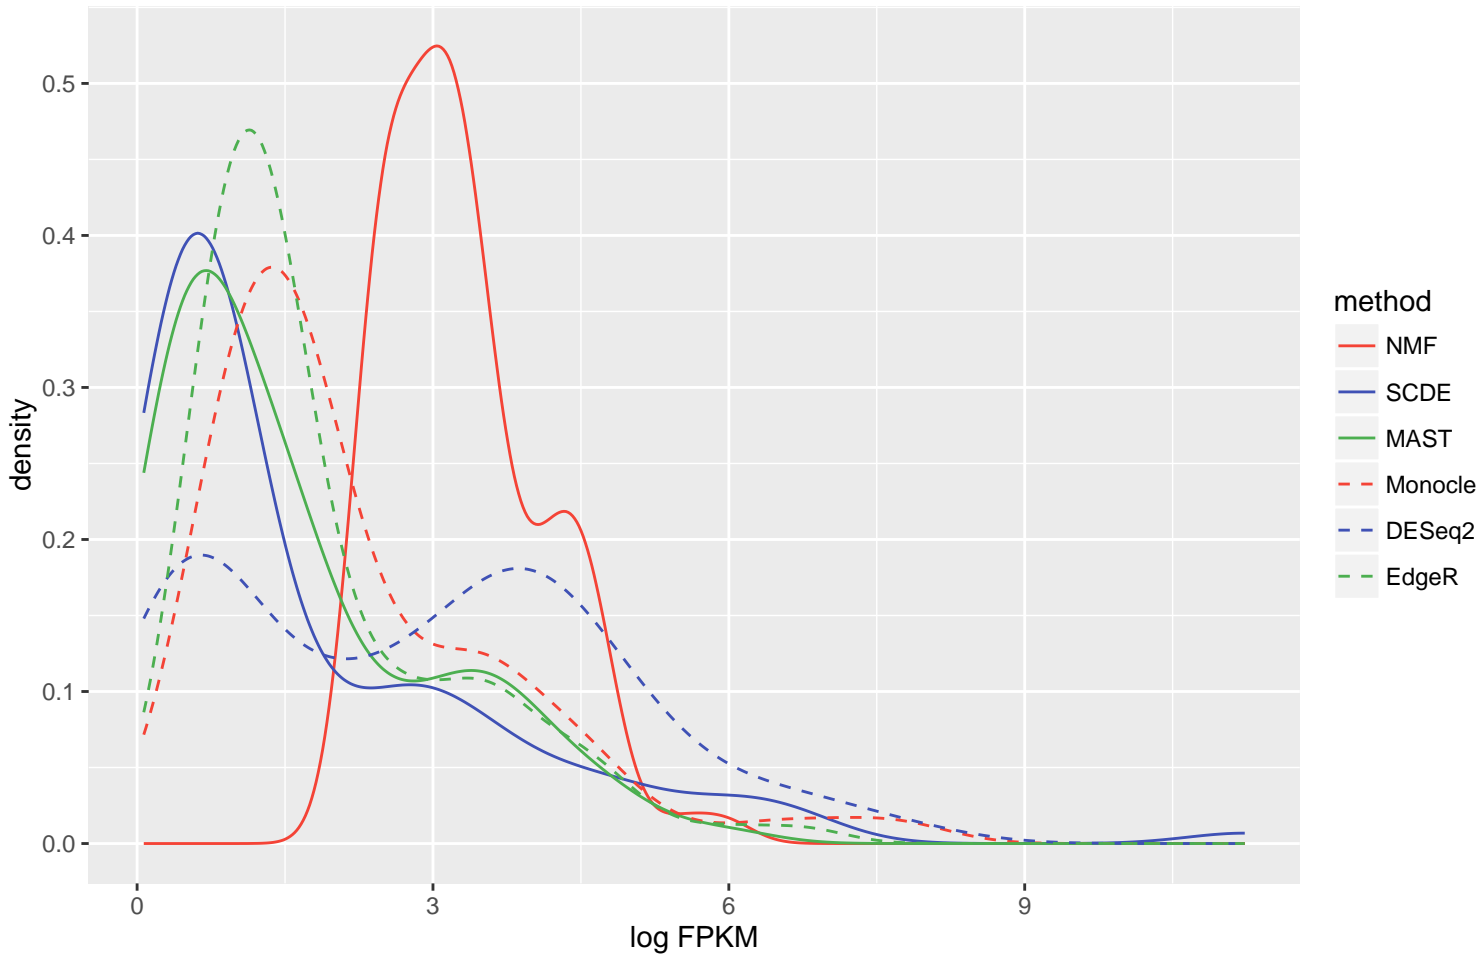

Supplement: peerj-05-2888-s003.pdf [file peerj-05-2888-s003.pdf]
