# Supplementary material for: Detecting heterogeneity in single-cell RNA-Seq data by non-negative matrix factorization
Source: PubMed Central journal article supplement (PMC5251935; doi:10.7717/peerj.2888), 2017-01-19

Comparing the CV<sup>2</sup> distribution of the genes selected by each method

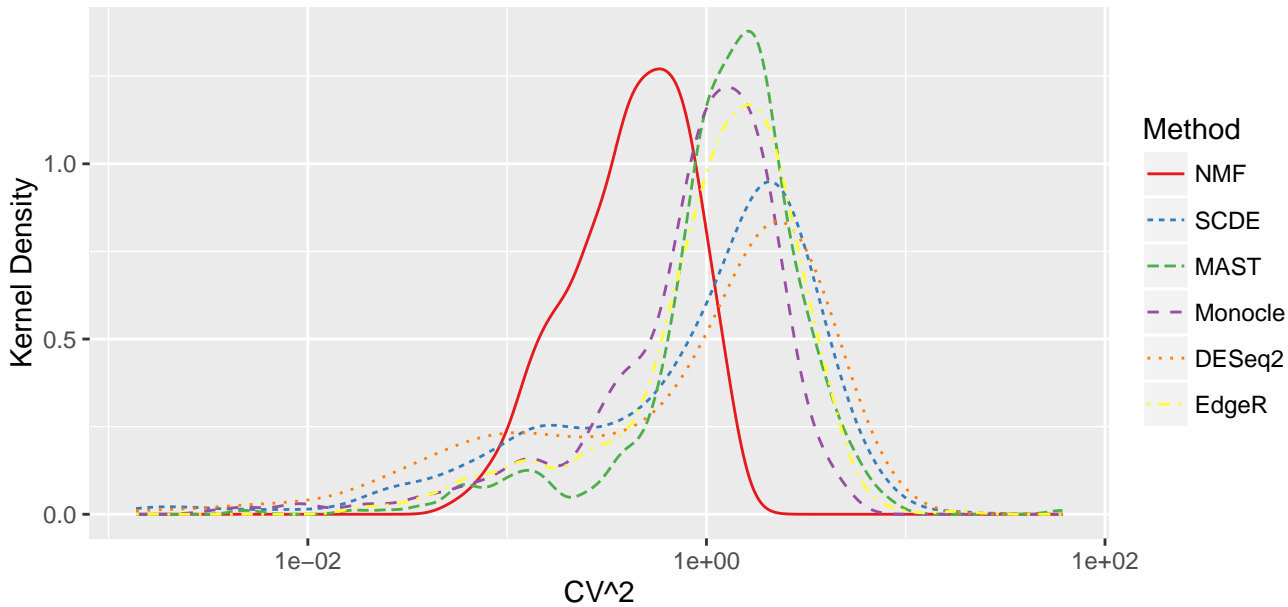

Supplement: peerj-05-2888-s005.pdf [file peerj-05-2888-s005.pdf]
